# Supplementary material for: Defining microbial community functions in chronic human infection with metatranscriptomics
Source: PubMed Central journal article supplement (PMC10734476; doi:10.1128/msystems.00593-23), 2023-10-12
Supplement: msystems.00593-23-s0004.pdf [file msystems.00593-23-s0004.pdf]

## 1 **Supplementary Material**

### 2 **Materials and Methods**

3 **Dataset Collection and Validation:** The datasets used for this study were identified by body part  
4 or tissue being affected in samples collected – chronic lower extremity ulcers for CW samples  
5 and sputum samples from people with CF, presence of original metatranscriptomic data, presence  
6 of comorbidities in patients and treatment course. We passed only reads with a minimum length  
7 of 22 to improve the specificity of mapping to reference databases in downstream application as  
8 previous data has shown that read length influences mapping (1).

9  
10 **Community Composition Analysis:** We reduced our Metaphlan4 output data to genera and  
11 species that had at least one percent abundance prevalence in at least 3 samples. Then we  
12 grouped these organisms at both genera and species levels as either aerobes, facultative  
13 anaerobes or obligate anaerobes. We defined obligate/facultative anaerobes based on culture  
14 requirements and how these organisms have frequently been identified/grouped in previous  
15 literature and textbooks (2-9).

16  
17 **Functional Profiling:** Two bioinformatic tools were used for functional profiling. The Simple  
18 Annotation of Metatranscriptomes by Sequence Analysis tool (SAMSA2) identified 4527 level 4  
19 enzyme classes and the DIAMOND\_analys\_counter.py scripts were used to aggregate the  
20 outputs which were eventually exported to R studio for statistical analysis. The diversity\_stats.R  
21 script of the SAMSA2 package was used to compute the mean Shannon and Simpson diversity  
22 indices for the two infection communities and the diversity\_gaphs.R script was used to plot the  
23 graphs of these. We performed differential expression analysis of the features in the both  
24 communities using the run\_DESeq\_stats.R script. The HMP Unified Metabolic Analysis Network  
25 (HUMANn3) tool, identified 594,273 UniRef protein families which were further regrouped to 2459  
26 unique ECs using the humann\_regroup\_table command and exported to Rstudio for differential  
27 expression analysis. For pathway mapping by HUMANn3, 490 pathways with metacyc IDs were  
28 identified and 162 of these had differential expression across the two infection communities.

29  
30  
31 **Assigning Functions to Functional Categories:** To assign E.C. numbers to functional  
32 categories, we first converted E.C. numbers to KEGG terms and used these to assign them to  
33 KEGG pathways. Pathways were then assigned to broader unified functional categories (e.g.  
34 Histidine metabolism and Tryptophan metabolism were both reclassified to “Amino acid  
35 metabolism”). Any functions without a KEGG ID were annotated with the ExplorEnz, BRENDA,  
36 and InterPro databases if possible. Pathways were assigned to MetaCyc “superclasses” based  
37 on their pathway IDs and then added to unified functional categories if necessary (e.g.  
38 peptidoglycan biosynthesis and lipid A biosynthesis were both assigned to “Cell Wall & Cell  
39 Membrane biosynthesis”). While E.C classes allowed us to perform functional category  
40 assignment, some of the additional identified features from SAMSA2 were not assigned E.C  
41 numbers or were not enzymes such as flagella, pili, typeIII secretion systems, and these were  
42 assigned functional categories based on description in previous literature (10-12).

43

44

45

46 **Statistical Analyses:**

47 For the HUMANn3 functional analyses, we performed differential expression analysis using

48 DESeq2 1.38.3 and MaAsLin2 1.12.0 in R studio.

49 **Figures**

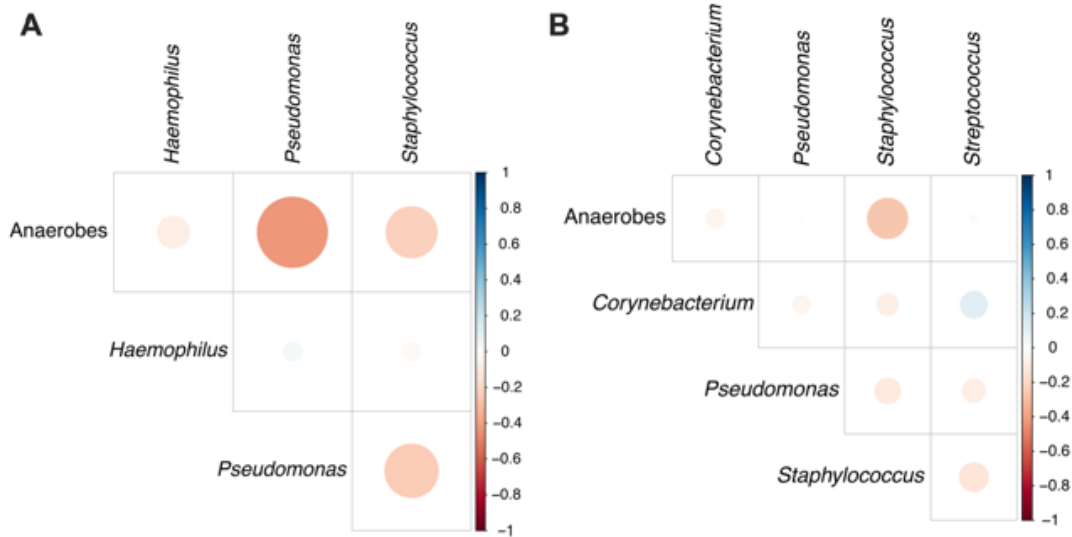

50  
 51 **Figure S1:** Co-occurrence of obligate anaerobes and traditional pathogens in CF and CW  
 52 samples. **A)** Obligate anaerobes (*Prevotella*, *Actinomyces*, *Veillonella* & *Fusobacterium*) have  
 53 negative correlation with CF pathogens (*Pseudomonas*, *Staphylococcus*, & *Haemophilus*). **B)**  
 54 Obligate anaerobes (*Finnegoldia*, *Anaerococcus*, *Peptoniphilus*, *Peptostreptococcus*, *Parvimonas*  
 55 and *Peptococcus*) have negative correlation with CW pathogens (*Staphylococcus*,  
 56 *Streptococcus*, *Pseudomonas*, and *Corynebacterium*). **A&B** show the Pearson correlation  
 57 coefficients between the sum of the relative abundances of the anaerobes, and each indicated  
 58 pathogen. The size of the circles corresponds to their Pearson correlation coefficients while the  
 59 color denotes if they are positive (blue) or negative (red).

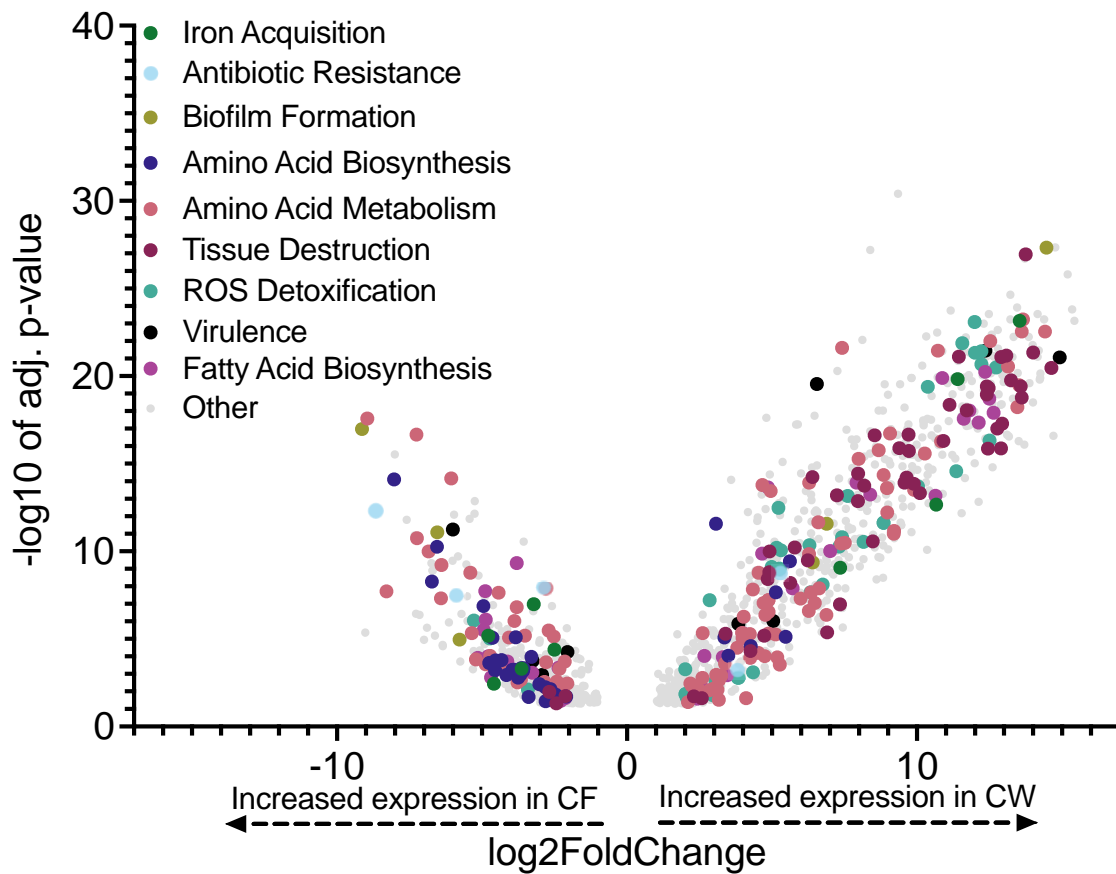

60  
 61  
 62  
 63  
 64  
 65  
 66  
 67  
 68

**Figure S2:** Volcano plot to highlight differentially expressed functions in both infection communities as identified by HUMANN3. 42.98% of the functions were differentially expressed (adjusted p-value < 0.05,  $\log_2$ FoldChange > 1) with 753 and 303 functions highly expressed in CW and CF samples respectively.

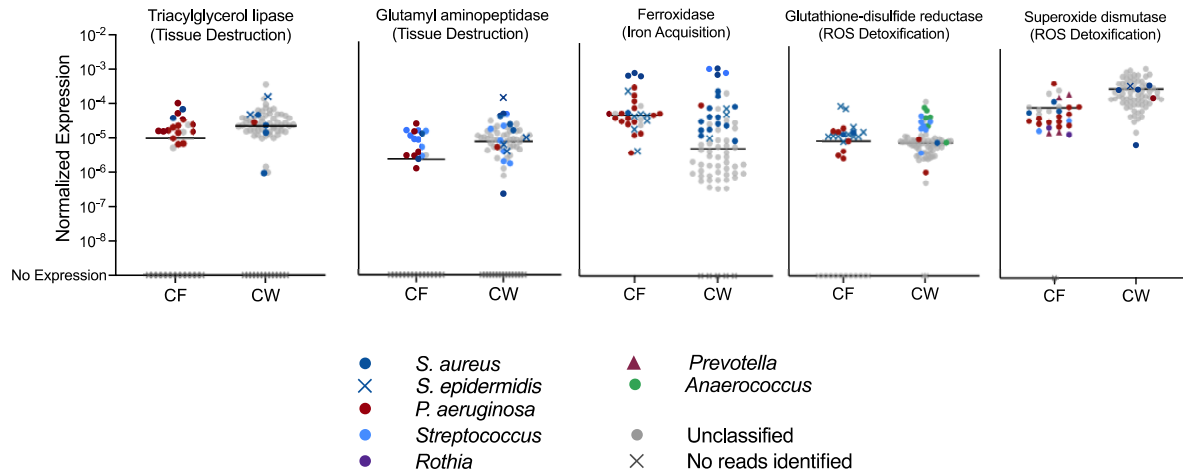

69

70 **Figure S3:** Dot plot to highlight bacterial contribution to the expression of differentially expressed  
 71 functions in CF and CW environments. Normalized expression (y-axis) refers to the sum of the  
 72 relative abundance of the bacteria species per sample for each function in log scale.

73 **Supplementary Datasets**

74 **Dataset S1:** Detailed metadata on all samples used for the study.

75  
76 **Dataset S2:** Functional analysis data. Sheet 1 - highlighted conserved functions identified with  
77 HUMANN3 and SAMSA2 and bacterial contribution to these functions. Sheet 2 - highlighted  
78 differentially expressed functions identified with HUMANN3 and SAMSA2 and bacterial  
79 contribution to these functions. Sheet 3 - all differentially expressed functions obtained from  
80 HUMANN3. Sheet 4 - all differentially expressed functions obtained from SAMSA2.

81  
82 **Dataset S3:** Pathway analysis data. Sheet 1- all pathway analysis data as identified by  
83 HUMANN3. Sheet 2 - all differentially expressed pathways obtained from HUMANN3.

84  
85  
86

87 **SUPPLEMENTAL REFERENCES**

- 88 1. Lewin, G. R., Stocke, K. S., Lamont, R. J., & Whiteley, M. (2022). A quantitative  
89 framework reveals traditional laboratory growth is a highly accurate model of human oral  
90 infection. *Proceedings of the National Academy of Sciences*, 119(2), e2116637119.  
91 <https://doi.org/10.1073/pnas.2116637119>
- 92 2. Boyanova, L., Vladimir Djambazov, Gergova, G., Dragomir Iotov, Petrov, D., Osmanliev,  
93 D., Minchev, Z., & Mitov, I. (2004). Anaerobic microbiology in 198 cases of pleural  
94 empyema: A Bulgarian study. *Anaerobe*, 10(5), 261–267.  
95 <https://doi.org/10.1016/j.anaerobe.2004.06.001>
- 96 3. Brook, I. (1986). Encapsulated anaerobic bacteria in synergistic infections.  
97 *Microbiological Reviews*, 50(4), 452–457.
- 98 4. Brook, I., & Frazier, E. H. (1990). Aerobic and anaerobic bacteriology of wounds and  
99 cutaneous abscesses. *Archives of Surgery*, 125(11):1445–1451.  
100 [doi:10.1001/archsurg.1990.01410230039007](https://doi.org/10.1001/archsurg.1990.01410230039007)
- 101 5. Choi, Y., Banerjee, A., McNish, S., Couch, K. S., Torralba, M. G., Lucas, S.,  
102 Tovchigrechko, A., Madupu, R., Yooseph, S., Nelson, K. E., Shanmugam, V. K., & Chan,  
103 A. P. (2019). Co-occurrence of Anaerobes in Human Chronic Wounds. *Microbial  
104 Ecology*, 77(3), 808–820. <https://doi.org/10.1007/s00248-018-1231-z>
- 105 6. Dowell, V. R. (1974). *Laboratory methods in anaerobic bacteriology: CDC laboratory  
106 manual*. Center for Disease Control.
- 107 7. Gulzar, M., & Zehra, A. (2018). *Staphylococcus aureus: A brief review*. *International  
108 Journal of Veterinary Science and Research*. <https://doi.org/10.17352/ijvsr.000031>
- 109 8. Hardie, J. M., & Whiley, R. A. (1995). The genus *Streptococcus*. In B. J. B. Wood & W.  
110 H. Holzapfel (Eds.), *The Genera of Lactic Acid Bacteria* (pp. 55–124). Springer US.  
111 [https://doi.org/10.1007/978-1-4615-5817-0\\_4](https://doi.org/10.1007/978-1-4615-5817-0_4)
- 112 9. Mirković, B., Murray, M. A., Lavelle, G. M., Molloy, K., Azim, A. A., Gunaratnam, C.,  
113 Healy, F., Slattery, D., McNally, P., Hatch, J., Wolfgang, M., Tunney, M. M., Muhlebach,  
114 M. S., Devery, R., Greene, C. M., & McElvaney, N. G. (2015). The Role of Short-Chain  
115 Fatty Acids, Produced by Anaerobic Bacteria, in the Cystic Fibrosis Airway. *American  
116 Journal of Respiratory and Critical Care Medicine*, 192(11), 1314–1324.  
117 <https://doi.org/10.1164/rccm.201505-0943OC>
- 118 10. Klausen, M., Aaes-Jørgensen, A., Molin, S., & Tolker-Nielsen, T. (2003). Involvement of  
119 bacterial migration in the development of complex multicellular structures in

120 Pseudomonas aeruginosa biofilms. *Molecular Microbiology*, 50(1), 61–68.  
121 <https://doi.org/10.1046/j.1365-2958.2003.03677.x>  
122 11. Klausen, M., Heydorn, A., Ragas, P., Lambertsen, L., Aaes-Jørgensen, A., Molin, S., &  
123 Tolker-Nielsen, T. (2003). Biofilm formation by *Pseudomonas aeruginosa* wild type,  
124 flagella and type IV pili mutants. *Molecular Microbiology*, 48(6), 1511–1524.  
125 <https://doi.org/10.1046/j.1365-2958.2003.03525.x>  
126 12. Veetilvalappil, V. V., Manuel, A., Aranjani, J. M., Tawale, R., & Koteshwara, A. (2022).  
127 Pathogenic arsenal of *Pseudomonas aeruginosa*: An update on virulence factors. *Future*  
128 *Microbiology*, 17(6), 465–481. <https://doi.org/10.2217/fmb-2021-0158>  
129  
130  
131
